# Supplementary material
Source: publisher figshare collection journal article supplement (https://acs.figshare.com/ndownloader/files/3834664)
Supplement: Supplementary file 1 [file 3834664]

  
data_final 
  
_audit_creation_method            SHELXL-97 
_chemical_name_systematic 
; 
 ? 
; 
_chemical_name_common             ? 
_chemical_melting_point           ? 
_chemical_formula_moiety          ? 
_chemical_formula_sum 
 'Ba4 P2.67' 
_chemical_formula_weight          632.05 
  
loop_ 
 _atom_type_symbol 
 _atom_type_description 
 _atom_type_scat_dispersion_real 
 _atom_type_scat_dispersion_imag 
 _atom_type_scat_source 
 'P'  'P'   0.1023   0.0942 
 'International Tables Vol C Tables 4.2.6.8 and 6.1.1.4' 
 'Ba'  'Ba'  -0.3244   2.2819 
 'International Tables Vol C Tables 4.2.6.8 and 6.1.1.4' 
  
_symmetry_cell_setting            Cubic 
_symmetry_space_group_name_H-M    I-43d 
  
loop_ 
 _symmetry_equiv_pos_as_xyz 
 'x, y, z' 
 '-x+1/2, -y, z+1/2' 
 '-x, y+1/2, -z+1/2' 
 'x+1/2, -y+1/2, -z' 
 'z, x, y' 
 'z+1/2, -x+1/2, -y' 
 '-z+1/2, -x, y+1/2' 
 '-z, x+1/2, -y+1/2' 
 'y, z, x' 
 '-y, z+1/2, -x+1/2' 
 'y+1/2, -z+1/2, -x' 
 '-y+1/2, -z, x+1/2' 
 'y+1/4, x+1/4, z+1/4' 
 '-y+1/4, -x+3/4, z+3/4' 
 'y+3/4, -x+1/4, -z+3/4' 
 '-y+3/4, x+3/4, -z+1/4' 
 'x+1/4, z+1/4, y+1/4' 
 '-x+3/4, z+3/4, -y+1/4' 
 '-x+1/4, -z+3/4, y+3/4' 
 'x+3/4, -z+1/4, -y+3/4' 
 'z+1/4, y+1/4, x+1/4' 
 'z+3/4, -y+1/4, -x+3/4' 
 '-z+3/4, y+3/4, -x+1/4' 
 '-z+1/4, -y+3/4, x+3/4' 
 'x+1/2, y+1/2, z+1/2' 
 '-x+1, -y+1/2, z+1' 
 '-x+1/2, y+1, -z+1' 
 'x+1, -y+1, -z+1/2' 
 'z+1/2, x+1/2, y+1/2' 
 'z+1, -x+1, -y+1/2' 
 '-z+1, -x+1/2, y+1' 
 '-z+1/2, x+1, -y+1' 
 'y+1/2, z+1/2, x+1/2' 
 '-y+1/2, z+1, -x+1' 
 'y+1, -z+1, -x+1/2' 
 '-y+1, -z+1/2, x+1' 
 'y+3/4, x+3/4, z+3/4' 
 '-y+3/4, -x+5/4, z+5/4' 
 'y+5/4, -x+3/4, -z+5/4' 
 '-y+5/4, x+5/4, -z+3/4' 
 'x+3/4, z+3/4, y+3/4' 
 '-x+5/4, z+5/4, -y+3/4' 
 '-x+3/4, -z+5/4, y+5/4' 
 'x+5/4, -z+3/4, -y+5/4' 
 'z+3/4, y+3/4, x+3/4' 
 'z+5/4, -y+3/4, -x+5/4' 
 '-z+5/4, y+5/4, -x+3/4' 
 '-z+3/4, -y+5/4, x+5/4' 
  
_cell_length_a                    9.7520(7) 
_cell_length_b                    9.7520(7) 
_cell_length_c                    9.7520(7) 
_cell_angle_alpha                 90.00 
_cell_angle_beta                  90.00 
_cell_angle_gamma                 90.00 
_cell_volume                      927.43(12) 
_cell_formula_units_Z             4 
_cell_measurement_temperature     200(2) 
_cell_measurement_reflns_used     1022 
_cell_measurement_theta_min       5.12 
_cell_measurement_theta_max       25.15 
  
_exptl_crystal_description        irregular 
_exptl_crystal_colour             black 
_exptl_crystal_size_max           0.05 
_exptl_crystal_size_mid           0.05 
_exptl_crystal_size_min           0.04 
_exptl_crystal_density_meas       . 
_exptl_crystal_density_diffrn     4.527 
_exptl_crystal_density_method     'not measured' 
_exptl_crystal_F_000              1056 
_exptl_absorpt_coefficient_mu     17.120 
_exptl_absorpt_correction_type    multi-scan 
_exptl_absorpt_correction_T_min   0.4815 
_exptl_absorpt_correction_T_max   0.5475 
_exptl_absorpt_process_details    'SADABS' 
  
_exptl_special_details 
; 
 ? 
; 
  
_diffrn_ambient_temperature       200(2) 
_diffrn_radiation_wavelength      0.71073 
_diffrn_radiation_type            MoK\a 
_diffrn_radiation_source          'fine-focus sealed tube' 
_diffrn_radiation_monochromator   graphite 
_diffrn_measurement_device_type   'CCD area detector' 
_diffrn_measurement_method        'phi and omega scans' 
_diffrn_detector_area_resol_mean  ? 
_diffrn_standards_number          ? 
_diffrn_standards_interval_count  ? 
_diffrn_standards_interval_time   ? 
_diffrn_standards_decay_%         ? 
_diffrn_reflns_number             3295 
_diffrn_reflns_av_R_equivalents   0.0407 
_diffrn_reflns_av_sigmaI/netI     0.0147 
_diffrn_reflns_limit_h_min        -10 
_diffrn_reflns_limit_h_max        12 
_diffrn_reflns_limit_k_min        -12 
_diffrn_reflns_limit_k_max        12 
_diffrn_reflns_limit_l_min        -12 
_diffrn_reflns_limit_l_max        12 
_diffrn_reflns_theta_min          5.12 
_diffrn_reflns_theta_max          28.18 
_reflns_number_total              194 
_reflns_number_gt                 187 
_reflns_threshold_expression      >2sigma(I) 
  
_computing_data_collection        'Bruker SMART' 
_computing_cell_refinement        'Bruker SMART' 
_computing_data_reduction         'Bruker SAINT' 
_computing_structure_solution     'SHELXS-97 (Sheldrick, 1990)' 
_computing_structure_refinement   'SHELXL-97 (Sheldrick, 1997)' 
_computing_molecular_graphics     'Bruker SHELXTL' 
_computing_publication_material   'Bruker SHELXTL' 
  
_refine_special_details 
; 
 Refinement of F^2^ against ALL reflections.  The weighted R-factor wR and 
 goodness of fit S are based on F^2^, conventional R-factors R are based 
 on F, with F set to zero for negative F^2^. The threshold expression of 
 F^2^ > 2sigma(F^2^) is used only for calculating R-factors(gt) etc. and is 
 not relevant to the choice of reflections for refinement.  R-factors based 
 on F^2^ are statistically about twice as large as those based on F, and R- 
 factors based on ALL data will be even larger. 
; 
  
_refine_ls_structure_factor_coef  Fsqd 
_refine_ls_matrix_type            full 
_refine_ls_weighting_scheme       calc 
_refine_ls_weighting_details 
 'calc w=1/[\s^2^(Fo^2^)+(0.0053P)^2^+4.9088P] where P=(Fo^2^+2Fc^2^)/3' 
_atom_sites_solution_primary      direct 
_atom_sites_solution_secondary    difmap 
_atom_sites_solution_hydrogens    . 
_refine_ls_hydrogen_treatment     . 
_refine_ls_extinction_method      SHELXL 
_refine_ls_extinction_coef        0.0051(2) 
_refine_ls_extinction_expression 
 'Fc^*^=kFc[1+0.001xFc^2^\l^3^/sin(2\q)]^-1/4^' 
_refine_ls_abs_structure_details 
 'Flack H D (1983), Acta Cryst. A39, 876-881' 
_refine_ls_abs_structure_Flack    0.03(9) 
_refine_ls_number_reflns          194 
_refine_ls_number_parameters      8 
_refine_ls_number_restraints      0 
_refine_ls_R_factor_all           0.0173 
_refine_ls_R_factor_gt            0.0160 
_refine_ls_wR_factor_ref          0.0305 
_refine_ls_wR_factor_gt           0.0304 
_refine_ls_goodness_of_fit_ref    1.264 
_refine_ls_restrained_S_all       1.264 
_refine_ls_shift/su_max           0.000 
_refine_ls_shift/su_mean          0.000 
  
loop_ 
 _atom_site_label 
 _atom_site_type_symbol 
 _atom_site_fract_x 
 _atom_site_fract_y 
 _atom_site_fract_z 
 _atom_site_U_iso_or_equiv 
 _atom_site_adp_type 
 _atom_site_occupancy 
 _atom_site_symmetry_multiplicity 
 _atom_site_calc_flag 
 _atom_site_refinement_flags 
 _atom_site_disorder_assembly 
 _atom_site_disorder_group 
Ba Ba 0.06658(3) 0.06658(3) 0.06658(3) 0.0265(2) Uani 1 3 d S . . 
P P 0.3750 0.0000 0.2500 0.0252(6) Uani 0.89 4 d SP . . 
  
loop_ 
 _atom_site_aniso_label 
 _atom_site_aniso_U_11 
 _atom_site_aniso_U_22 
 _atom_site_aniso_U_33 
 _atom_site_aniso_U_23 
 _atom_site_aniso_U_13 
 _atom_site_aniso_U_12 
Ba 0.0265(2) 0.0265(2) 0.0265(2) 0.00072(15) 0.00072(15) 0.00072(15) 
P 0.0280(16) 0.0238(9) 0.0238(9) 0.000 0.000 0.000 
  
_geom_special_details 
; 
 All esds (except the esd in the dihedral angle between two l.s. planes) 
 are estimated using the full covariance matrix.  The cell esds are taken 
 into account individually in the estimation of esds in distances, angles 
 and torsion angles; correlations between esds in cell parameters are only 
 used when they are defined by crystal symmetry.  An approximate (isotropic) 
 treatment of cell esds is used for estimating esds involving l.s. planes. 
; 
  
loop_ 
 _geom_bond_atom_site_label_1 
 _geom_bond_atom_site_label_2 
 _geom_bond_distance 
 _geom_bond_site_symmetry_2 
 _geom_bond_publ_flag 
Ba P 3.2059(4) 6_455 ? 
Ba P 3.2059(4) 2_554 ? 
Ba P 3.2059(4) 10_545 ? 
Ba P 3.5591(4) . ? 
Ba P 3.5591(4) 5 ? 
Ba P 3.5591(4) 9 ? 
Ba Ba 3.8058(4) 26_454 ? 
Ba Ba 3.8058(4) 27_544 ? 
Ba Ba 3.8058(4) 28_445 ? 
Ba Ba 4.2227(3) 13 ? 
Ba Ba 4.2228(3) 37_444 ? 
Ba Ba 4.6048(5) 40_444 ? 
P Ba 3.2058(4) 27_544 ? 
P Ba 3.2059(4) 39_444 ? 
P Ba 3.2059(4) 13 ? 
P Ba 3.2059(4) 2 ? 
P Ba 3.5591(4) 28_445 ? 
P Ba 3.5591(4) 16_545 ? 
P Ba 3.5591(4) 38_544 ? 
  
loop_ 
 _geom_angle_atom_site_label_1 
 _geom_angle_atom_site_label_2 
 _geom_angle_atom_site_label_3 
 _geom_angle 
 _geom_angle_site_symmetry_1 
 _geom_angle_site_symmetry_3 
 _geom_angle_publ_flag 
P Ba P 90.692(10) 6_455 2_554 ? 
P Ba P 90.692(10) 6_455 10_545 ? 
P Ba P 90.691(10) 2_554 10_545 ? 
P Ba P 161.446(5) 6_455 . ? 
P Ba P 107.269(2) 2_554 . ? 
P Ba P 84.615(1) 10_545 . ? 
P Ba P 107.270(2) 6_455 5 ? 
P Ba P 84.616(1) 2_554 5 ? 
P Ba P 161.446(5) 10_545 5 ? 
P Ba P 79.698(9) . 5 ? 
P Ba P 84.616(1) 6_455 9 ? 
P Ba P 161.447(5) 2_554 9 ? 
P Ba P 107.269(2) 10_545 9 ? 
P Ba P 79.698(9) . 9 ? 
P Ba P 79.698(9) 5 9 ? 
P Ba Ba 60.289(4) 6_455 26_454 ? 
P Ba Ba 104.538(3) 2_554 26_454 ? 
P Ba Ba 146.732(13) 10_545 26_454 ? 
P Ba Ba 117.377(15) . 26_454 ? 
P Ba Ba 51.475(10) 5 26_454 ? 
P Ba Ba 57.7 9 26_454 ? 
P Ba Ba 146.732(13) 6_455 27_544 ? 
P Ba Ba 60.288(4) 2_554 27_544 ? 
P Ba Ba 104.537(3) 10_545 27_544 ? 
P Ba Ba 51.474(10) . 27_544 ? 
P Ba Ba 57.7 5 27_544 ? 
P Ba Ba 117.377(15) 9 27_544 ? 
Ba Ba Ba 108.708(9) 26_454 27_544 ? 
P Ba Ba 104.538(3) 6_455 28_445 ? 
P Ba Ba 146.731(13) 2_554 28_445 ? 
P Ba Ba 60.288(4) 10_545 28_445 ? 
P Ba Ba 57.7 . 28_445 ? 
P Ba Ba 117.377(15) 5 28_445 ? 
P Ba Ba 51.474(10) 9 28_445 ? 
Ba Ba Ba 108.708(9) 26_454 28_445 ? 
Ba Ba Ba 108.708(9) 27_544 28_445 ? 
P Ba Ba 124.774(7) 6_455 13 ? 
P Ba Ba 124.774(7) 2_554 13 ? 
P Ba Ba 124.773(7) 10_545 13 ? 
P Ba Ba 47.722(6) . 13 ? 
P Ba Ba 47.722(6) 5 13 ? 
P Ba Ba 47.722(6) 9 13 ? 
Ba Ba Ba 69.776(9) 26_454 13 ? 
Ba Ba Ba 69.776(9) 27_544 13 ? 
Ba Ba Ba 69.776(9) 28_445 13 ? 
P Ba Ba 55.226(7) 6_455 37_444 ? 
P Ba Ba 55.226(7) 2_554 37_444 ? 
P Ba Ba 55.226(7) 10_545 37_444 ? 
P Ba Ba 132.277(6) . 37_444 ? 
P Ba Ba 132.278(6) 5 37_444 ? 
P Ba Ba 132.278(6) 9 37_444 ? 
Ba Ba Ba 110.225(9) 26_454 37_444 ? 
Ba Ba Ba 110.224(9) 27_544 37_444 ? 
Ba Ba Ba 110.224(9) 28_445 37_444 ? 
Ba Ba Ba 180.0 13 37_444 ? 
P Ba Ba 88.846(8) 6_455 40_444 ? 
P Ba Ba 44.095(1) 2_554 40_444 ? 
P Ba Ba 134.763(9) 10_545 40_444 ? 
P Ba Ba 107.176(10) . 40_444 ? 
P Ba Ba 43.961(2) 5 40_444 ? 
P Ba Ba 117.698(6) 9 40_444 ? 
Ba Ba Ba 65.592(4) 26_454 40_444 ? 
Ba Ba Ba 59.372(1) 27_544 40_444 ? 
Ba Ba Ba 160.633(16) 28_445 40_444 ? 
Ba Ba Ba 91.144(8) 13 40_444 ? 
Ba Ba Ba 88.856(8) 37_444 40_444 ? 
Ba P Ba 91.810(2) 27_544 39_444 ? 
Ba P Ba 91.810(2) 27_544 13 ? 
Ba P Ba 159.529(12) 39_444 13 ? 
Ba P Ba 159.527(12) 27_544 2 ? 
Ba P Ba 91.809(2) 39_444 2 ? 
Ba P Ba 91.809(2) 13 2 ? 
Ba P Ba 68.238(6) 27_544 . ? 
Ba P Ba 85.627(9) 39_444 . ? 
Ba P Ba 77.052(1) 13 . ? 
Ba P Ba 132.153(7) 2 . ? 
Ba P Ba 132.153(7) 27_544 28_445 ? 
Ba P Ba 77.052(1) 39_444 28_445 ? 
Ba P Ba 85.626(9) 13 28_445 ? 
Ba P Ba 68.237(6) 2 28_445 ? 
Ba P Ba 64.6 . 28_445 ? 
Ba P Ba 77.052(1) 27_544 16_545 ? 
Ba P Ba 68.237(6) 39_444 16_545 ? 
Ba P Ba 132.151(7) 13 16_545 ? 
Ba P Ba 85.625(9) 2 16_545 ? 
Ba P Ba 135.6 . 16_545 ? 
Ba P Ba 135.6 28_445 16_545 ? 
Ba P Ba 85.626(9) 27_544 38_544 ? 
Ba P Ba 132.152(7) 39_444 38_544 ? 
Ba P Ba 68.237(6) 13 38_544 ? 
Ba P Ba 77.051(1) 2 38_544 ? 
Ba P Ba 135.6 . 38_544 ? 
Ba P Ba 135.572(1) 28_445 38_544 ? 
Ba P Ba 64.641(1) 16_545 38_544 ? 
  
_diffrn_measured_fraction_theta_max    1.000 
_diffrn_reflns_theta_full              28.18 
_diffrn_measured_fraction_theta_full   1.000 
_refine_diff_density_max    0.664 
_refine_diff_density_min   -0.324 
_refine_diff_density_rms    0.098 
